# Supplementary material for: A novel biosensor based on Blu-ray disc coating film for determination of total amino acid content in tea leaves
Source: Royal Society of Chemistry journal article supplement (doi:10.1039/d1ra07061d), 2021-01-01
Supplement: d1ra07061d1.pdf [file d1ra07061d1.pdf]

1 *Supporting Information for:*

2

3 **A novel biosensor based on Blu-ray disc coating film for**  
4 **determination of total amino acid content in tea leaves**

5 Lanling Chu<sup>a, c</sup>, Yunzheng Wang<sup>a</sup>, Yu Zhou<sup>b\*</sup>, and Xuejun Kang<sup>c\*</sup>

6

7 <sup>a</sup> School of Light Industry and Food Engineering, Nanjing Forestry University, Nanjing, Jiangsu 210037, China.

8 <sup>b</sup> State Key Laboratory of Tea Plant Biology and Utilization, Anhui Agricultural University, Hefei, Anhui 230036,  
9 China.

10 <sup>c</sup> School of Biological Science and Medical Engineering, Southeast University, Nanjing, Jiangsu 210096, China.

11 \* E-mail: microbes@ahau.edu.cn; xjkang64@163.com.

12

13 Experimental details on the characterization of Blu-ray disc (BD) surfaces are described.

14 **1. Contact angle measurements of NaOH-treated BD-R surface**

15 Contact angle measurement is a convenient method for the characterization of solid/liquid interfaces.<sup>1</sup> Water  
16 contact angles on activated BD-R surface were measured via an AST Optima system with a horizontal light beam  
17 illuminating the liquid droplet under ambient conditions (21-27 °C, 45-60 % relative humidity). The contact angles  
18 are equilibrated values of sessile liquid drops of deionized water or buffer solution.

19 The untreated sample is hydrophobic with a water contact angle of  $92 \pm 2^\circ$ . During NaOH solution treatment,  
20 the surface became more and more hydrophilic (Figure 1 in the main text) with increasing hydrolyzed time. After  
21 45 min, the angle remained constant at  $33 \pm 2^\circ$ . The similar change from hydrophobicity to hydrophilicity was  
22 observed when BD-R substrates were micro-patterned with filter paper as masks during base solution treatment.

23 For contact-angle titrations (Figure 3 in the main text), the activated BD-R samples were immersed in buffer  
24 solution for 60 s before the measurement. Buffer solutions were prepared according to Creager et al as follows,<sup>2</sup>  
25 pH 0-1, perchloric acid; pH 2-3, phosphoric acid/sodium phosphate monobasic; pH 4-5, acetic acid/sodium acetate;

26 pH 6-8, sodium phosphate monobasic/sodium phosphate dibasic, pH 9-11, sodium bicarbonate/sodium carbonate;  
27 pH 12, sodium phosphate dibasic/sodium phosphate tribasic; and pH 13-14, sodium hydroxide. The ionic strength  
28 was kept constant (0.01 M), except at very high and low pH. Exact pH values for buffer solutions were obtained  
29 with a pH meter (Oakton, Singapore), and recorded before and after the contact angle measurements. Each point  
30 represents an average of at least four measurements. The clear transition of contact angle transition from pH 4 to  
31 9 indicates the ionization of surface carboxylic acid groups. The treated surface becomes more hydrophilic: free  
32 energy of solid/liquid interface becomes lower and contact angle decreases, as these carboxylic acid groups are  
33 transformed to carboxylate groups upon exposure to a basic aqueous buffer solution.

34

## 35 **2. Determination of the surface density of -COOH on activated BD film**

36 To determine the surface density of carboxylic acid groups (-COOH) resulting from hydrolyzed treatment, crystal  
37 violet, a cationic dye, was utilized. This method relies on the electrostatic interactions between crystal violet  
38 molecules and carboxylate groups. First, the treated substrates were immersed in 1 mM crystal violet solution for  
39 5 min. After rinsing with deionized water, the substrates were incubated first with ethanol aqueous solution (80  
40 %, v/v) and second with 0.10 M HCl (in 20% ethanol aqueous solution) until the dye can't be observed on the  
41 surface. Then the two incubation solutions were combined and the absorbance were measured with a UV/Vis  
42 spectrometer. So, the concentration of crystal violet released was calculated according to Beer's law ( $A = \epsilon cl$ ) and  
43 utilized to determine the surface density of -COOH groups. The value show in the main text ( $6.6 \pm 0.7 \times 10^{-9}$  mol/cm<sup>2</sup>)  
44 is an average over six samples.

45

## 46 **3. ATR-IR spectrum of the Hard Coat™ film of Verbatim BD-Rs**

47 We further studied the composition of the Hard Coat™ layer of Verbatim BD-Rs using Infrared spectroscopy. The  
48 untreated BD film, treated BD film with hydrolysis, and the supernatant from BD film dissolved with 10 M NaOH  
49 solution were dertermined. The spectrum shown in Figure 1S was obtained on a Spectrum Two™ FTIR  
50 Spectrometer with an Attenuated Total Reflectance (ATR) accessory (PerkinElmer). From Fig. S1, the spectrums of  
51 the untreated and treated sample are the same but very different from dissolved sample, which means some  
52 chemical groups changes just on the surface of BD film. There are some distinct peaks in the same spectrums at  
53 2926 cm<sup>-1</sup> (CH<sub>2</sub> stretching), 1725 cm<sup>-1</sup> (C=O stretching), 1450-1600 cm<sup>-1</sup> (C=C stretching from aromatic), 1112-1252

54  $\text{cm}^{-1}$  (C-O stretching from esters),  $1057 \text{ cm}^{-1}$  (C-O stretching from alcohols), and  $700\text{-}800 \text{ cm}^{-1}$  (C-H stretching from  
55 aromatic). Also, There are two distinct peaks in the spectrums of dissolved sample at  $3347 \text{ cm}^{-1}$  (O-H stretching  
56 from alcohols) and  $1551 \text{ cm}^{-1}$  (C=O stretching from carboxylate salts).

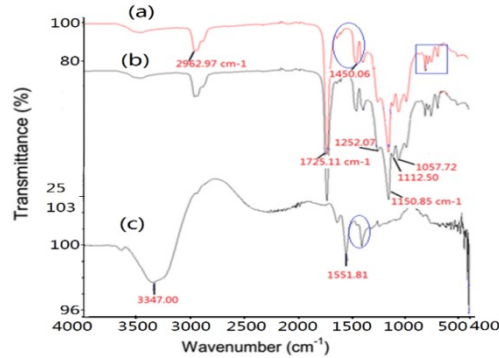

57

58 Fig. 1S ATR-IR spectrum of the Hard Coat™ film of Verbatim BD-Rs. (a) untreated sample, (b) treated sample, and  
59 (c) dissolved sample

#### 60 4. $^{13}\text{C}$ -NMR spectrum of hard coating layer of Verbatim BD-Rs

61 We further studied the composition of BD film using  $^{13}\text{C}$ -NMR spectrum as Fig. S2 shown. The peaks at 175 ppm  
62 and 43 ppm probably indicate a kind of lactone containing six-membered ring; the peaks at 130 ppm and 136  
63 ppm indicate the group of benzene ring; the peaks at 76 ppm and 65 ppm indicate the group of ester ( $\text{CH}_2\text{OOC}$  or  
64  $\text{CHOOC}$ ); the peaks at 160 ppm indicates the group of esters ( $\text{COOR}$ ) or ketones ( $\text{COX}$ ).

65

66 Fig. 2S.  $^{13}\text{C}$ -NMR spectrum of the Hard Coat™ film of Verbatim BD-Rs.

67

#### 68 5. Possible hydrolysis reactions

69 In this study, the challenging question is unknown material composition and what exact reactions occurred on  
70 the surface upon hydrolysis. Based on above analysis of spectrums and some references, we listed three possible  
71 main compositions and hydrolysis reaction. One composition is a (meth)acrylate-based polymer having lactone  
72 ring unit,<sup>3</sup> another polymer Having Glutaric Anhydride Unit and a diluent having two (meth)acryloyl groups  
73 within one molecule.<sup>4</sup>

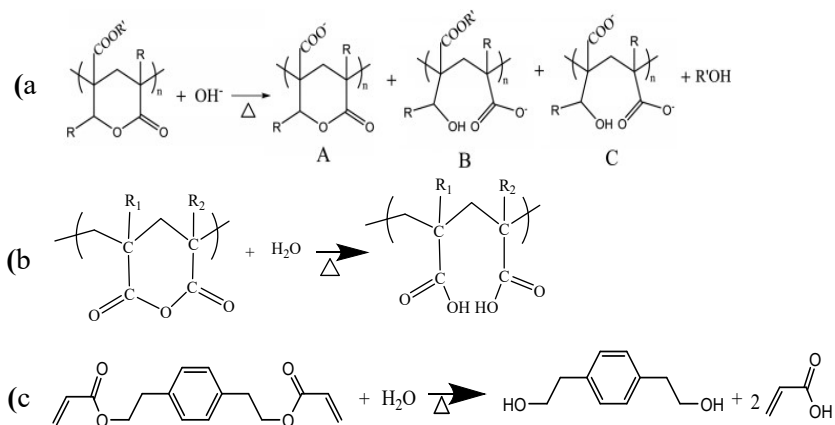

74

75 Fig. 3S Possible hydrolysis reactions on the BD-R surface. (a) polymer having lactone ring unit; (b) Polymer Having

76 Glutaric Anhydride Unit; (c) A diluent having two (meth)acryloyl groups within one molecule

77

## 78 Reference

79 1. Y. C. Ko, B.D. Ratner and A.S. Hoffman, *J. Colloid Interf. Sci.*, 1981, **82**, 25-37.

80 2. S.E. Creager and J. Clarke, *Langmuir*, 1994, **10**, 3675-3683.

81 3. S. Weng, X. C. Li, M. Niu, et al., *Anal.Chem.*, 2016, **88**, 6889-6896.

82 4. S. Kondo and H. Yoneyama, *Hardcoat laminate: U.S. Patent*, 2013, **8,726**.
